# Supplementary material for: Genetics of prostate cancer: a review of latest evidence
Source: HighWire-hosted journal article supplement (doi:10.1136/jmg-2024-109845), 2024-08-13
Supplement: jmg-2024-109845supp001_data_supplement.pdf [file jmg-2024-109845supp001_data_supplement.pdf]

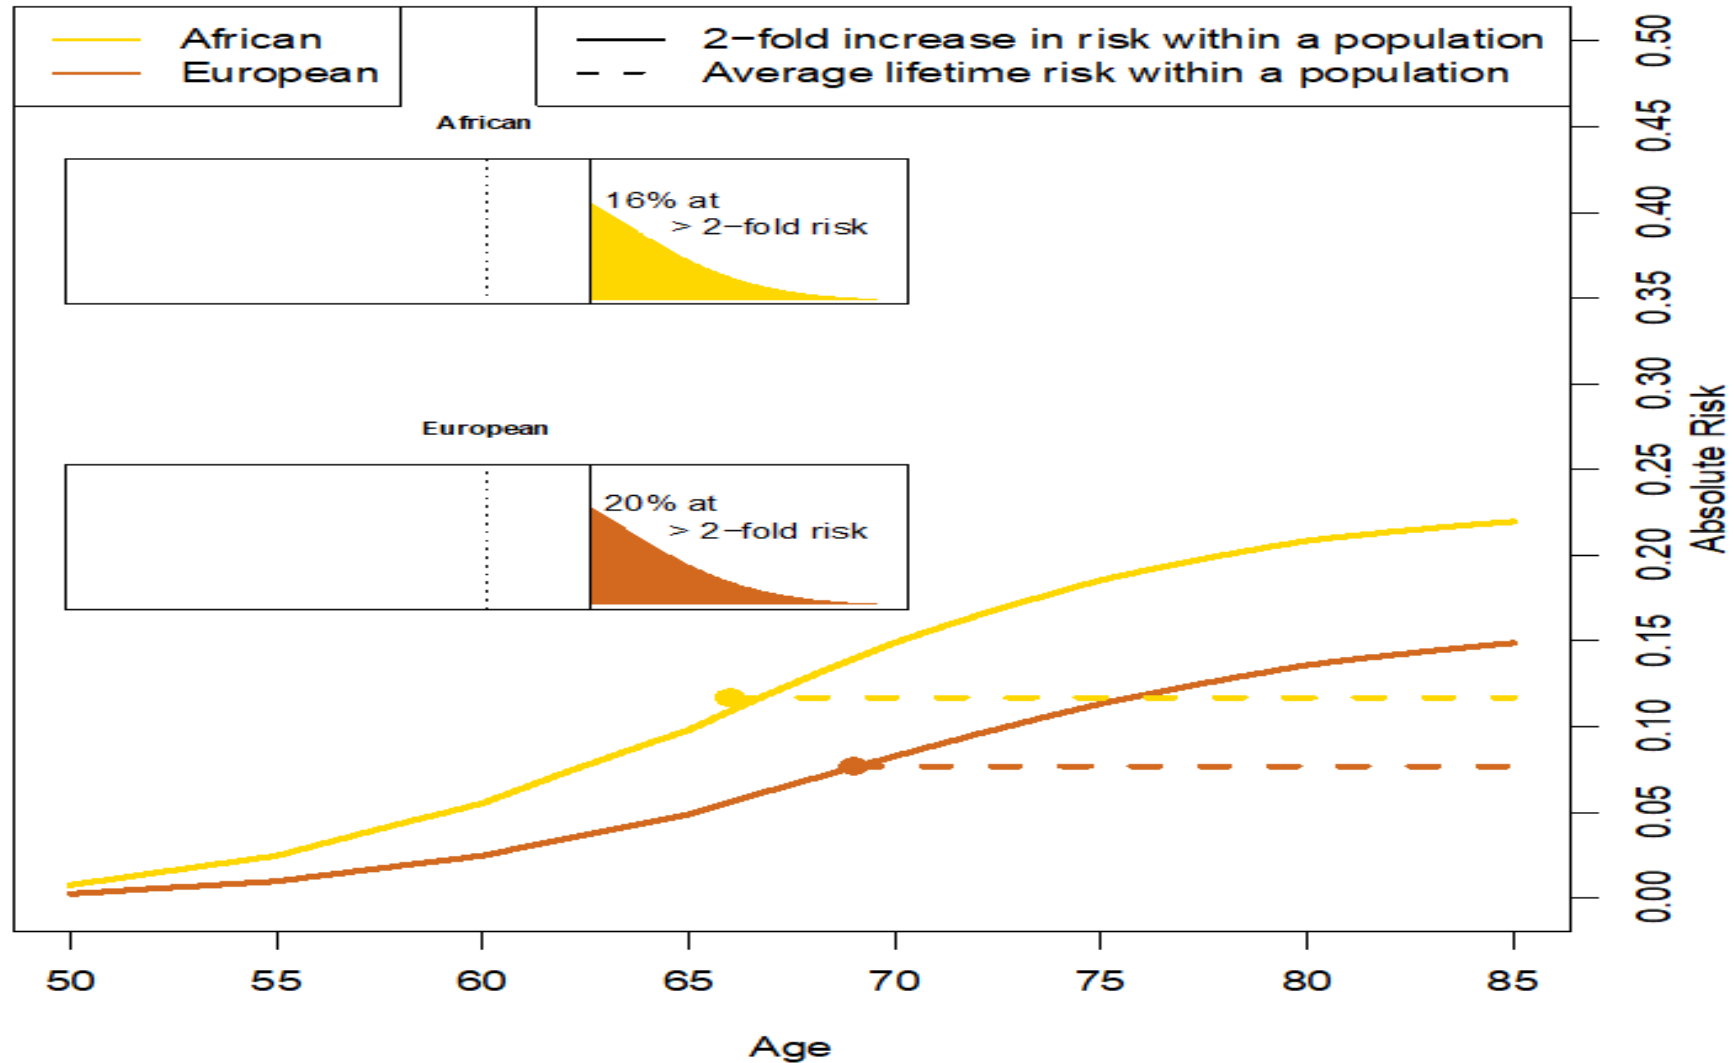

**Supplemental figure 1. Wang et al 2023** - This paper showed that those of African Ancestry have the same risk of prostate cancer at age 66 as those of European ancestry of age 85.
