# Supplementary material for: Genetics of prostate cancer: a review of latest evidence
Source: HighWire-hosted journal article supplement (doi:10.1136/jmg-2024-109845), 2024-08-13
Supplement: jmg-2024-109845supp005_data_supplement.pdf [file jmg-2024-109845supp005_data_supplement.pdf]

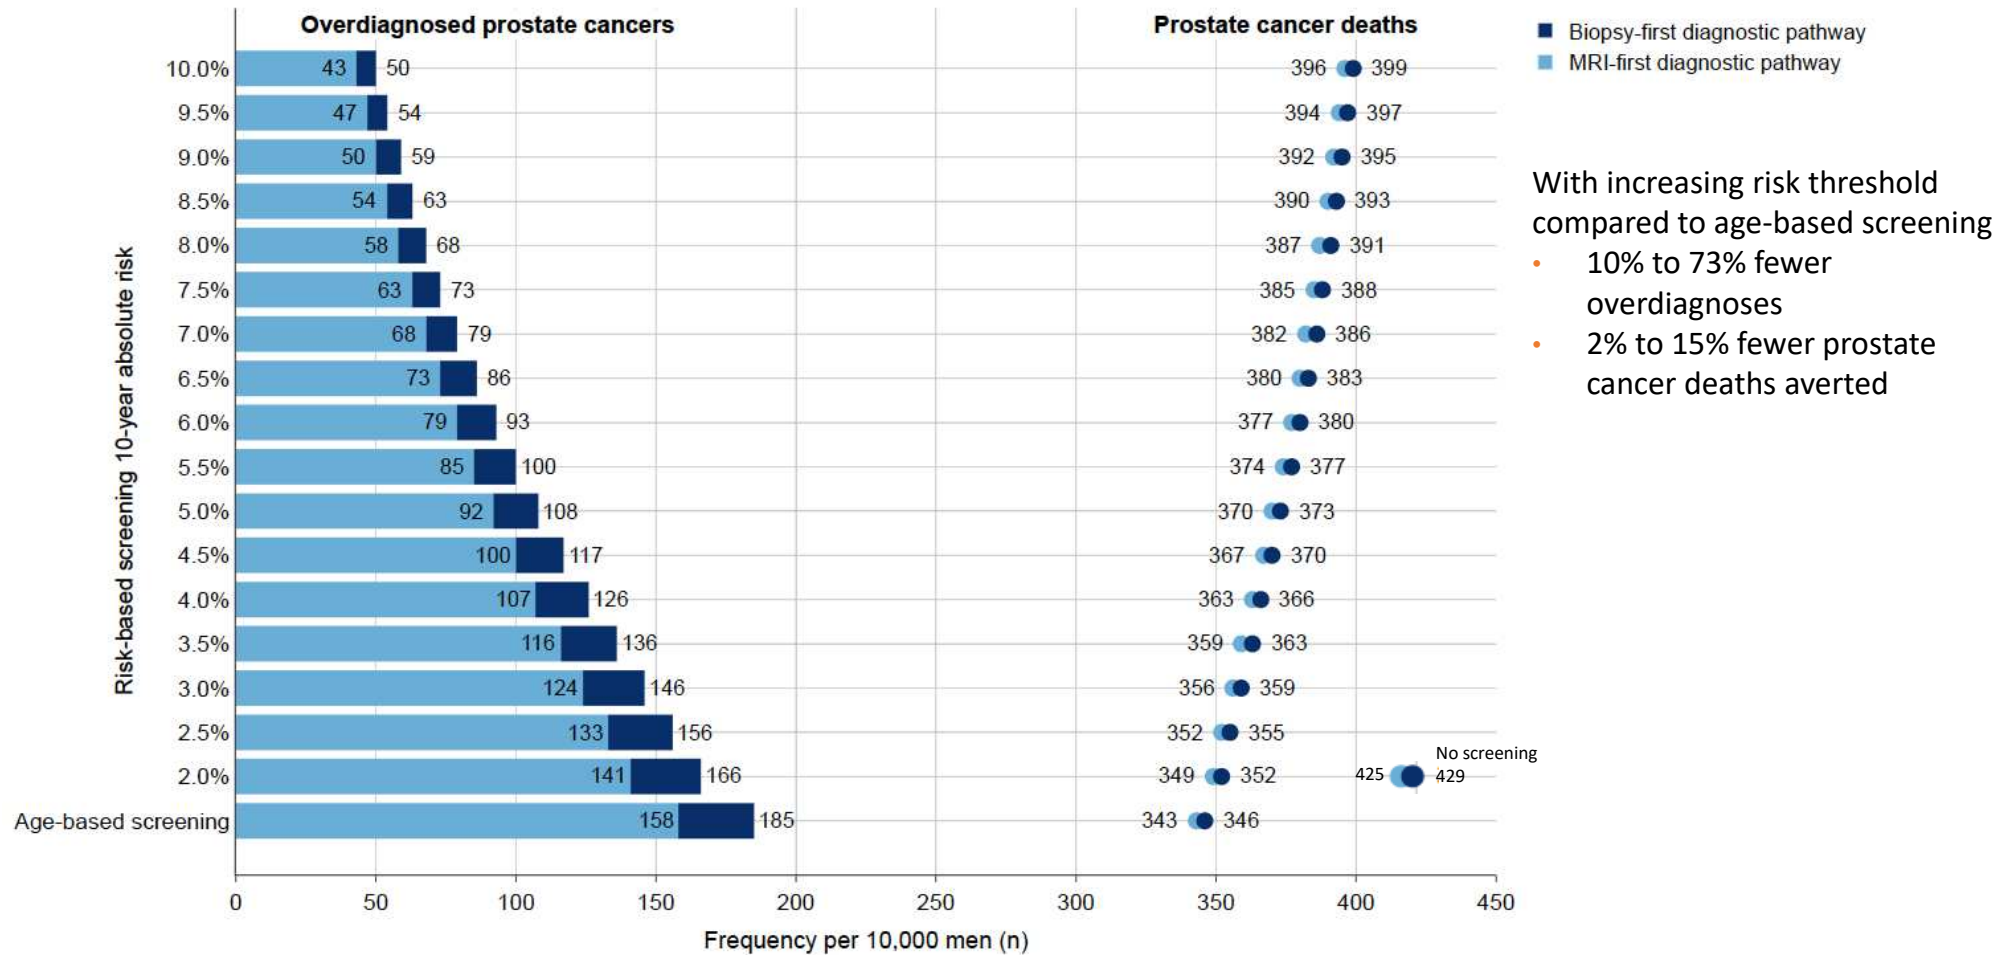

**Supplemental figure 5. Callender et al. 2021** - Combining MRI-prior to biopsy with risk-stratified screening further improved the benefit-harm balance and the cost-effectiveness of the screening program compared to age-based screening.
